# Supplementary material for: Multiepitope-Based Subunit Vaccine Design and Evaluation against Respiratory Syncytial Virus Using Reverse Vaccinology Approach
Source: MDPI journal article supplement (doi:10.3390/vaccines8020288), 2020-06-08
Supplement: s1 [file s1]

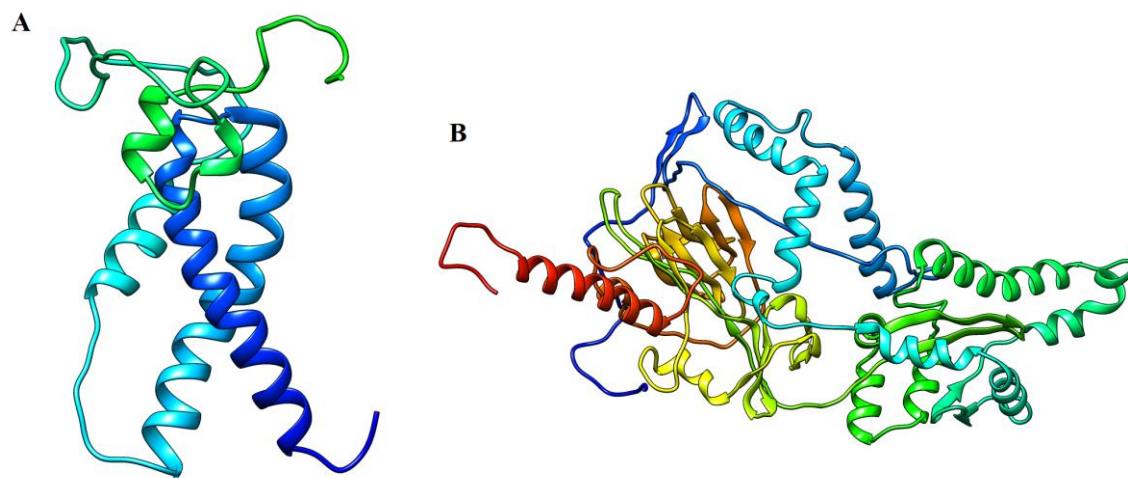

**Figure 1.** 3D structural representation of RSV antigenic proteins: (A) G protein and (B) F protein. RaptorX was used to predict these structures. These 3D structures were predicted to forecast conformational B-cell epitopes from target proteins and identifying their particular positions on proteins structures.

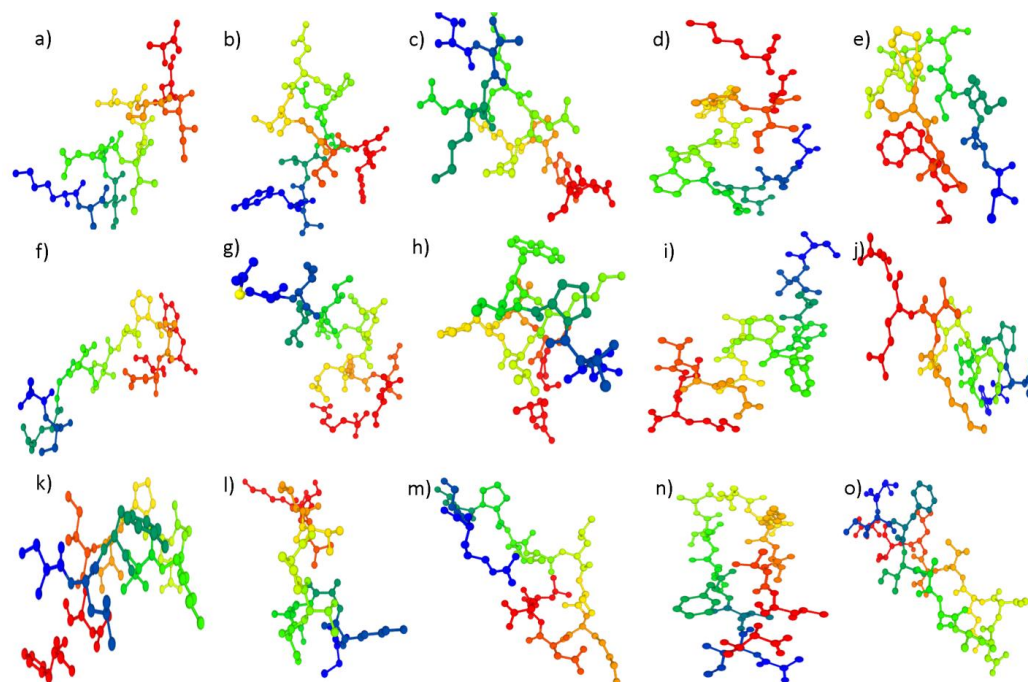

**Figure 2.** 3D structures of MHC Class I and MHC Class II epitopes. These 3D structures were predicted by PEP-FOLD v3.0 server and used as ligands in molecular docking against their respective HLA alleles. .

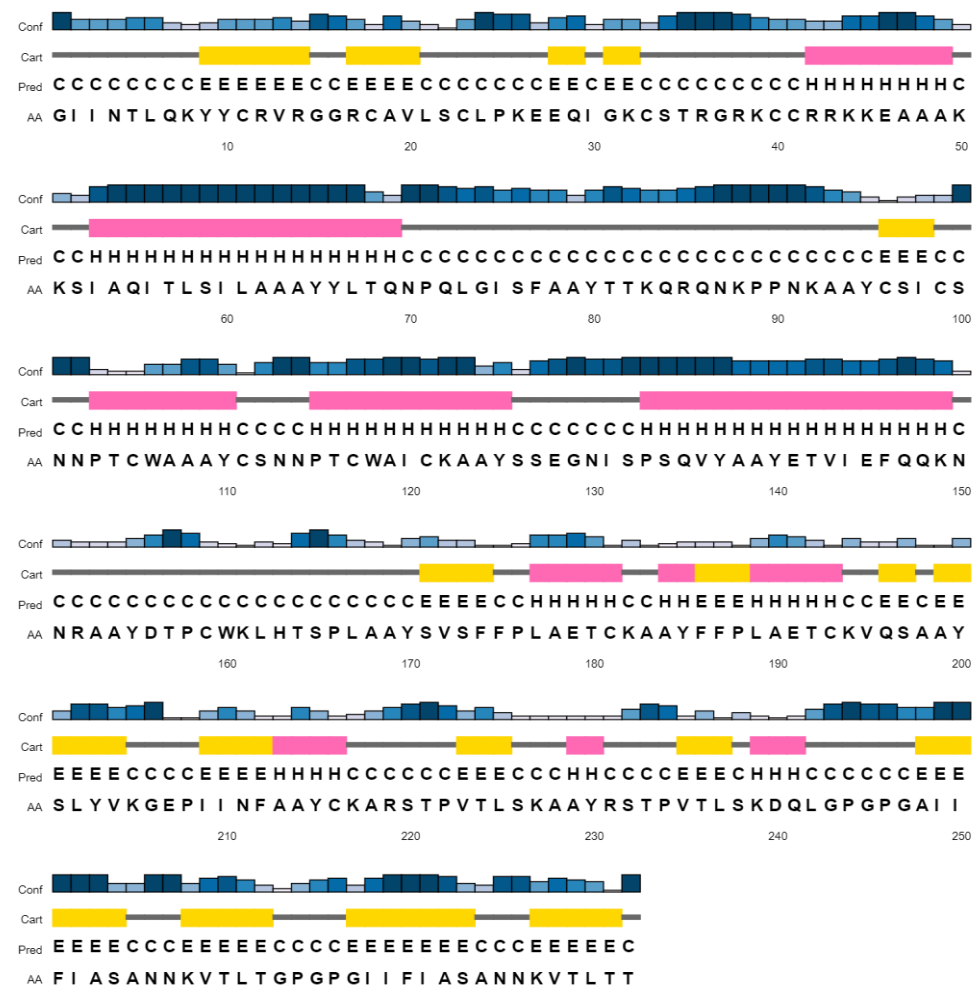

**Figure 3.** Secondary structure analyses of RSV MEV construct. Yellow bars are representing strands, pink bars are representing helices and grey lines are representing coils.

**Table 1.** RSV antigenic proteins physiochemical properties.

| Proteins       | Molecular Weight | Theoretical pI | Instability index | Half-Life                                                                                                              | Stability Profiling | Aliphatic Index | Grand Average of Hydropathy |
|----------------|------------------|----------------|-------------------|------------------------------------------------------------------------------------------------------------------------|---------------------|-----------------|-----------------------------|
| Glycoprotein   | 32767.53         | 9.85           | 37.25             | 30 hours (mammalian reticulocytes, in vitro).<br>>20 hours (yeast, in vivo).<br>>10 hours (Escherichia coli, in vivo). | stable              | 75.64           | -0.520                      |
| Fusion protein | 63334.16         | 9.01           | 40.42             | 30 hours (mammalian reticulocytes, in vitro).<br>>20 hours (yeast, in vivo).<br>>10 hours (Escherichia coli, in vivo). | unstable            | 101.50          | -0.007                      |

**Table 2.** Prediction of RSV proteins Secondary structure through SOPMA.

| Proteins       | Sequence Length | $\alpha$ -helix | $\beta$ -Turn | Random Coils |
|----------------|-----------------|-----------------|---------------|--------------|
| Glycoprotein   | 298             | 19.80%          | 3.36%         | 52.35%       |
| Fusion protein | 574             | 36.76%          | 8.71%         | 31.18%       |

**Table 3.** Predicted CTL Epitopes. The epitopes listed in the table showed 100% conservancy among the both protein sequences included in the present study.

| Proteins     | Peptide       | Position | Allele      | Antigenicity |
|--------------|---------------|----------|-------------|--------------|
| Glycoprotein | HFEVFNFPVPCSI | 164-175  | HLA-B*40:01 | 0.7          |
|              | NLKSIAQITLSI  | 34-45    | HLA-A*32:01 | 1.0          |
|              | KSIAQITLSILA  | 36-47    | HLA-A*32:01 | 0.6          |
|              | GNPEHTSQEETL  | 54-65    | HLA-B*38:01 | 0.6          |
|              | NPEHTSQEETLH  | 55-66    | HLA-B*38:01 | 0.7          |
|              | LKSIAQITLSIL  | 35-46    | HLA-A*32:01 | 0.6          |
|              |               |          | HLA-B*44:03 |              |
|              |               |          | HLA-A*01:01 |              |
|              |               |          | HLA-B*44:02 |              |
|              | SSEGNISPSQVY  | 269-280  | HLA-B*15:25 | 0.7          |
|              |               |          | HLA-A*30:02 |              |
|              |               |          | HLA-B*58:02 |              |
|              |               |          | HLA-B*15:01 |              |
|              |               |          | HLA-A*30:02 |              |
|              |               |          | HLA-B*15:25 |              |
|              | ATSQIKNTTPTY  | 79-90    | HLA-B*15:01 | 0.8          |
|              |               |          | HLA-B*58:02 |              |
|              |               |          | HLA-A*01:01 |              |
|              |               |          | HLA-B*15:01 |              |
|              |               |          | HLA-A*30:02 |              |
|              | ISPSQVYTTSEY  | 274-285  | HLA-B*35:01 | 0.6          |
|              |               |          | HLA-A*01:01 |              |
|              |               |          | HLA-B*15:25 |              |
|              |               |          | HLA-B*58:01 |              |
|              | CSICSNNPTCWA  | 173-184  |             | 0.6          |
|              | AAIIFIASANNK  | 57-68    | HLA-A*11:01 | 0.7          |
|              | NNPTCWAICKRI  | 178-189  | HLA-B*51:01 | 0.9          |
|              | TTKQRQNKPPNK  | 147-158  | HLA-A*30:01 | 0.7          |
|              | NNDFHFEVFNFV  | 160-171  | HLA-B*38:01 | 1.14         |
|              | CSNNPTCWAICK  | 176-186  | HLA-A*11:01 | 0.6          |
|              | YLTQNPQLGISF  | 90-101   | HLA-B*15:02 | 1.31         |
|              | LPIVNBKQSCSIS | 204-215  | HLA-B*51:01 | 1.05         |

|                       |              |         |                                                                                          |      |
|-----------------------|--------------|---------|------------------------------------------------------------------------------------------|------|
| <b>Fusion protein</b> | DTVSVGNTLYYV | 448-459 | HLA-A*26:01<br>HLA-A*68:02,<br>HLA-A*29:02,<br>HLA-A*25:01<br>HLA-A*01:01<br>HLA-A*26:01 | 0.73 |
|                       | VDTVSVGNTLYY | 447-458 | HLA-A*01:01<br>HLA-A*29:02,<br>HLA-A*25:01<br>HLA-A*01:01                                | 0.6  |
|                       | LLSLIAVGLLLY | 538-549 | HLA-A*29:02,<br>HLA-A*30:02<br>HLA-A*11:01,                                              | 0.7  |
|                       | SLIAVGLLLYCK | 540-551 | HLA-A*03:01,<br>HLA-A*29:02,<br>HLA-A*03:01                                              | 0.8  |
|                       | YQSTCSAVSKGY | 33-44   | HLA-B*15:01,<br>HLA-B*15:02<br>HLA-A*01:01,<br>HLA-A*29:02,                              | 1.03 |
|                       | KGYLSALRTGWY | 42-53   | HLA-B*58:01,<br>HLA-B*57:01,<br>HLA-A*30:02                                              | 0.5  |
|                       | FFPLAETCKVQS | 351-362 | HLA-B*51:01,<br>HLA-B*35:03<br>HLA-A*01:01,                                              | 0.6  |
|                       | GVDTVSVGNTLY | 446-457 | HLA-A*26:01,<br>HLA-A*29:02<br>HLA-A*25:01,                                              | 0.7  |
|                       | YVKGEPIINFYD | 468-479 | HLA-A*26:01<br>HLA-A*30:01<br>HLA-A*11:01                                                | 1.2  |
|                       | CKARSTPVTLSK | 550-561 | HLA-B*08:01,<br>HLA-B*07:02                                                              | 0.6  |
|                       | DTPCWKLHTSPL | 310-321 | HLA-B*48:01,<br>HLA-A*11:01                                                              | 0.8  |
|                       | RQQSYSIMSIK  | 282-293 |                                                                                          |      |

|              |         |                                                           |      |
|--------------|---------|-----------------------------------------------------------|------|
| WYCDNAGSVSFF | 341-352 | HLA-A*24:02<br>HLA-A*23:01<br>HLA-B*38:01<br>HLA-A*03:01, | 0.6  |
| SLSNGVSVLTSK | 180-191 | HLA-A*74:01,<br>HLA-A*11:01                               | 0.7  |
| RSTPVTLSKDQL | 553-564 | HLA-B*58:01,<br>HLA-B*58:02                               | 0.7  |
| LLLYCKARSTPV | 546-557 | HLA-B*08:01,<br>HLA-A*02:01<br>HLA-A*01:01<br>HLA-A*29:02 | 1.09 |
| LYVKGEPIINFY | 467-478 | HLA-A*23:01,<br>HLA-A*26:01<br>HLA-A*25:01                | 0.6  |
| NTKEGSNICLTR | 325-336 | HLA-A*68:01<br>HLA-A*33:03                                | 1.0  |
| SLYVKGEPIINF | 466-477 | HLA-A*23:01<br>HLA-B*15:02                                | 0.7  |
| LRTGWYTSVITI | 48-59   | HLA-A*32:01,<br>HLA-B*27:02,<br>HLA-B*27:05               | 0.6  |
| SVSFFPLAETCK | 348-359 | HLA-A*03:01,<br>HLA-A*11:01                               | 0.7  |
| LSLIAVGLLLYC | 539-550 | HLA-A*29:02,<br>HLA-A*01:01                               | 0.8  |
| TELQLLMQSTPA | 91-102  | HLA-B*18:01,<br>HLA-B*40:02                               | 0.7  |
| ETVIEFQQKNNR | 218-229 | HLA-A*68:01,<br>HLA-A*33:03                               | 1.3  |
| TPCWKLHTSPLC | 311-322 | HLA-B*08:01<br>HLA-B*35:03,<br>HLA-B*07:02                | 0.9  |
| NDMPITNDQKKL | 262-273 | HLA-B*35:03,<br>HLA-B*37:01                               | 0.6  |

**Table 4.** Predicted HTL Epitopes. The boxes colored with blue, light grey and black shows the strong, intermediate and non-binding affinities towards the respective human HLA alleles.

[illegible]



**Table 5.** Predicted linear B-cell epitopes of RSV proteins.

| Proteins       | B Cell Epitope (Position) | Antigenicity |
|----------------|---------------------------|--------------|
| Glycoprotein   | TQIQPSKPTTKQRQNK 139      | 0.68         |
|                | TSQIKNTTPTYLTQNP 80       | 0.75         |
|                | KPTIKTTKKDLKPQTT 205      | 1.19         |
|                | CSICSNNPTCWAICKR 173      | 0.83         |
|                | TKDQRTAKTLEKTWDT 4        | 0.56         |
|                | PNIRTTLLTNSTTGNP 241      | 0.67         |
|                | ESILQSTTVKTKNTTT 123      | 0.59         |
|                | SGTTSQTTAILALTTP 105      | 0.55         |
|                | SQEETLHSTSSEGNIS 260      | 0.53         |
|                | HSTSSEGNISPSQVYT 266      | 0.51         |
|                | PTTKQRQNKPPNKPNN 146      | 0.79         |
|                | VKTKNTTTTQIQPSKP 131      | 0.83         |
|                | SCLYKLNLSIAQITL 28        | 0.77         |
|                | TYLTQNPQLGISFFNL 89       | 1.17         |
|                | HLLFISSCLYKLNLS 22        | 0.50         |
|                | LGISFFNLSTTSQTT 97        | 1.30         |
|                | LLTNSTTGNPEHTSQE 247      | 0.69         |
|                | AIIFIASANNKVTLT 58        | 0.63         |
|                | KPPNKPNNDFHFEVFN 154      | 0.58         |
|                | KSIAQITLSILAMIIS 36       | 0.54         |
|                | YGVIDTPCWKLHTSPL 306      | 0.56         |
|                | NIDIFNPKYDCKIMTS 383      | 0.78         |
|                | GSNICLTRDRGWYCD 329       | 0.83         |
|                | SCSISNIETVIEFQQK 211      | 1.03         |
|                | TSVITIELSNIKENKC 54       | 0.61         |
|                | LLEITREFSVNAGVTT 230      | 0.60         |
| Fusion protein | CKARSTPVTLSKDQLS 550      | 0.83         |
|                | LIAGVGLLYCKARSTP 541      | 1.06         |
|                | SPLCTTNTKEGSNICL 319      | 1.37         |
|                | GSVSFFPLAETCKVQS 347      | 0.73         |
|                | TRDRGWYCDNAGSVS 335       | 0.97         |
|                | TNAITAILAAVTLCA 8         | 0.50         |
|                | TVSVGNTLYYVKNQEG 449      | 0.83         |

---

|                       |      |
|-----------------------|------|
| TCSAVSKGYLSALRTG 36   | 0.71 |
| FIRKSDELLHNVNAGK 505  | 0.51 |
| NEKINQSLAFIRKSDE 496  | 0.72 |
| YVSNKGVDTVSVGNTL 441  | 0.73 |
| IETVIEFQQKNNRLE 217   | 0.88 |
| SLGAIVSCYGKTKCTA 409  | 0.77 |
| NIKENKCNGTDAKVKL 63   | 0.52 |
| VKGEPINFYDPLVFP 469   | 0.55 |
| QEGKSLYVKGEPIINF 462  | 0.50 |
| GSAIASGIAVSKVLHL 145  | 0.58 |
| PRFMNYTLNNTKNTNV 112  | 0.89 |
| GVSVLTSKVLDLKNYI 184  | 0.76 |
| SDEFDASISQVNEKIN 485  | 0.66 |
| PIVNBKQSCSISNIETV 205 | 0.74 |
| TLYYVNBKQEGKSLYVK 455 | 0.52 |
| NVTLSKKRKRRLGFL 126   | 1.20 |
| NVNAGKSTTNIMITTI 515  | 0.73 |
| PVTLSKDQLSGINNIA 556  | 0.62 |

---

Table 6. Predicted conformational B-cell epitopes of RSV proteins.

| Protein      | Conformational B-Cell Epitopes                                                 | 3D Structure                                                                         |
|--------------|--------------------------------------------------------------------------------|--------------------------------------------------------------------------------------|
| Glycoprotein | C:T104, C:C105, C:W106                                                         | 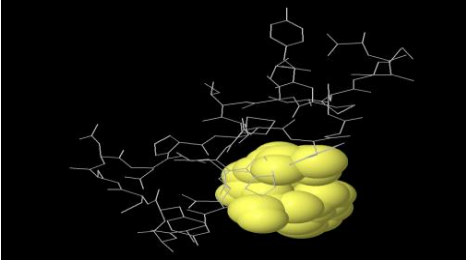  |
|              | C:A94, C:Y95, C:C121, C:K122, C:A123, C:A124                                   |   |
|              | C:N101, C:A107, C:A108, C:A109, C:Y110, C:C111, C:S112, C:N113, C:N114, C:P115 |  |

**Fusion Protein**

:M1, \_:E2, \_:L3, \_:P4, \_:I5, \_:L6, \_:K7, \_:T8, \_:N9, \_:A10, \_:I11,  
\_:T12, \_:A13, \_:I14, \_:L15, \_:A16, \_:A17, \_:V18, \_:T19, \_:L20,  
\_:C21, \_:F22, \_:A23, \_:S24, \_:S25, \_:Q26, \_:N27, \_:I28, \_:T29,  
\_:E30, \_:E31, \_:F32, \_:Y33, \_:Q34, \_:S35, \_:T36, \_:C37, \_:S38,  
\_:A39, \_:V40, \_:S41, \_:K42, \_:G43, \_:Y44, \_:L45, \_:S46, \_:A47,  
\_:L48, \_:K421

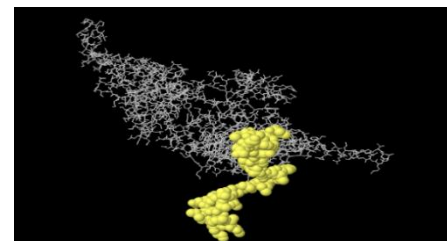

:I332, \_:D392, \_:E472, \_:F477, \_:Y478, \_:D479, \_:P480, \_:L481,  
\_:V482, \_:F483, \_:P484, \_:S485, \_:S493, \_:Q494, \_:V495,  
\_:N496, \_:E497, \_:K498, \_:I499, \_:N500, \_:Q501, \_:S502,  
\_:L503, \_:A504, \_:F505, \_:I506, \_:R507, \_:K508, \_:S509, \_:D510,  
\_:L512, \_:L513, \_:H514, \_:N515, \_:V516, \_:N517, \_:A518,  
\_:G519, \_:K520, \_:S521, \_:T522, \_:T523

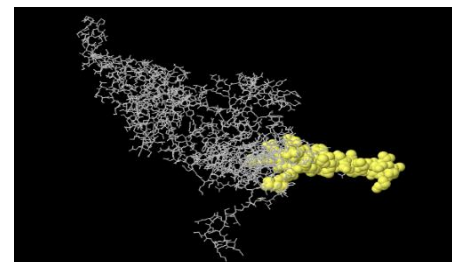

A153, \_:V154, \_:S155, \_:K156, \_:V157, \_:L158, \_:H159, \_:L160,  
\_:E161, \_:G162, \_:E163, \_:V164, \_:N165, \_:K166, \_:I167,  
\_:K168, \_:S169, \_:A170, \_:L171, \_:L172, \_:S173, \_:T174,  
\_:N175, \_:K176, \_:A177, \_:V178, \_:V179, \_:S180, \_:L181,  
\_:S182, \_:N183, \_:G184, \_:V185, \_:S186, \_:V187, \_:L188,  
\_:T189, \_:S190, \_:K191, \_:V192, \_:L193, \_:D194, \_:L195,  
\_:K196, \_:N197, \_:Y198, \_:I199, \_:D200, \_:K201, \_:Q202,  
\_:L203, \_:L204, \_:P205, \_:I206, \_:V207, \_:N208, \_:K209,  
\_:Q210, \_:S211, \_:C212, \_:S213, \_:I214, \_:S215, \_:N216, \_:I217,  
\_:E218, \_:T219, \_:V220, \_:I221, \_:E222, \_:F223, \_:Q224, \_:Q225,  
\_:K226, \_:N227, \_:N228, \_:L230, \_:L231, \_:T234, \_:S290, \_:I291,  
\_:I292, \_:K293, \_:E294, \_:E295, \_:V296, \_:L297, \_:A298

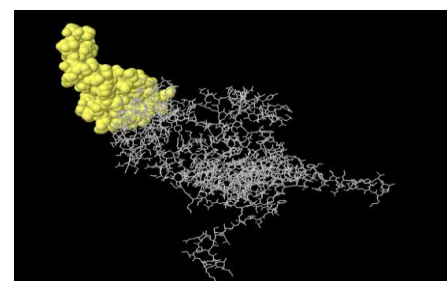

:R49, \_:T50, \_:G51, \_:W52, \_:Q94, \_:L95, \_:L96, \_:M97, \_:Q98,  
\_:S99, \_:T100, \_:P101, \_:A102, \_:T103, \_:N104, \_:N105, \_:R106,  
\_:A107, \_:R108, \_:R109, \_:E110, \_:L111, \_:P112, \_:R113, \_:F114,  
\_:M115, \_:N116, \_:Y117, \_:L119, \_:N120, \_:N121, \_:T122,  
\_:K123, \_:G418, \_:K419, \_:T420

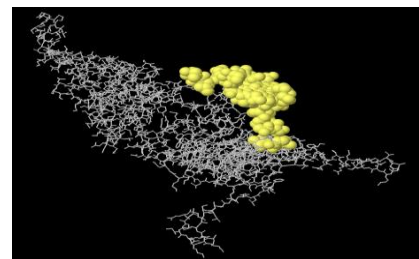

:S259, \_:N262, \_:D263, \_:M264, \_:P265, \_:I266, \_:T267, \_:N268,  
\_:D269, \_:K271

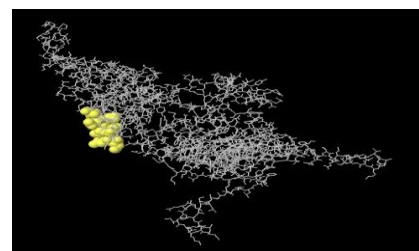

\_:N426, \_:K427, \_:D428, \_:R429, \_:G430, \_:I431, \_:I432,  
\_:G446, \_:V447, \_:D448

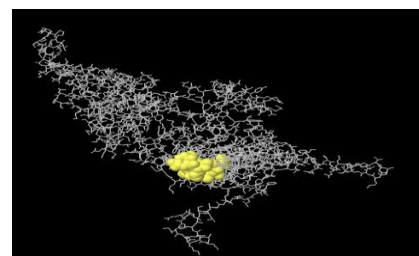

:A346, \_:G347, \_:S348, \_:P376, \_:S377, \_:E378, \_:L381, \_:I384,  
\_:D385, \_:I386, \_:N388, \_:P389, \_:K390

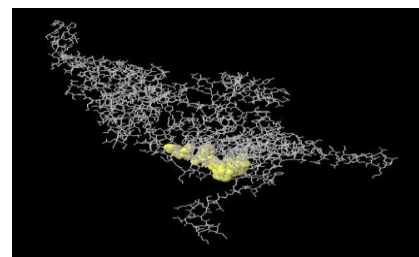

C69, \_:N70, \_:G71, \_:T72, \_:D73, \_:A74, \_:K75, \_:V76, \_:K77

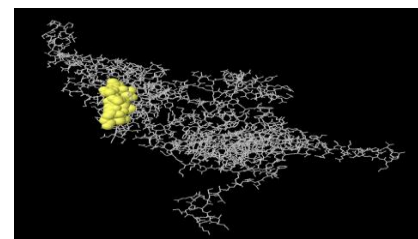

:T323, \_:T324, \_:N325, \_:T326, \_:K327, \_:E328, \_:G329, \_:S330,  
\_:N331, \_:K399

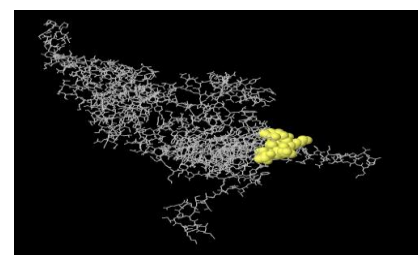

**Table 7.** Codon optimized nucleotide sequence of MEV construct for cloning in *E. coli* strain K12. Red color bold sequence at 5' site (N-terminal) is representing HindIII restriction enzyme site, while green color bold sequence at 3' site (C-terminal) is representing BamHI restriction enzyme site.

```
AAGCTTGGTATCATCAACACCCTGCAGAAATACTACTGCCGTGTTTCGTGGTGGTCGTTGCGCTGTTCTGTCTTGCCTGCCGAAAGAAGAACAGATCG
GTAAATGCTCTACCCGTGGTCGTAAATGCTGCCGTCGTAAAAAAGAAGCTGCTGCTAAAAAATCTATCGCTCAGATCACCCCTGTCTATCCTGGCTGC
TGCTTACTACCTGACCCAGAACCCGCAGCTGGGTATCTCTTTCGCTGCTTACACCACCAAAACAGCGTCAGAACAAACCGCCGAACAAAGCTGCTTA
CTGCTCTATCTGCTCTAACAACCCGACCTGCTGGGCTGCTGCTTACTGCTCTAACAACCCGACCTGCTGGGCTATCTGCAAAGCTGCTTACTCTTCTG
AAGGTAACATCTCTCCGTCTCAGGTTTACGCTGCTTACGAAACCGTTATCGAATTCCAGCAGAAAAACAACCGTGCTGCTTACGACACCCCGTGCTG
GAAACTGCACACCTCTCCGCTGGCTGCTTACTCTGTTTCTTTCTTCCCGCTGGCTGAAACCTGCAAAGCTGCTTACTTCTTCCCGCTGGCTGAAACCTG
CAAAGTTCAGTCTGCTGCTTACTCTCTGTACGTTAAAGGTGAACCGATCATCAACTTCGCTGCTTACTGCAAAGCTCGTTCTACCCCGGTTACCCTGT
CTAAAGCTGCTTACCGTTCTACCCCGGTTACCCTGTCTAAAGACCAGCTGGGTCCGGGTCCGGGTGCTATCATCTTCATCGCTTCTGCTAACAACAA
AGTTACCCTGACCGGTCCGGGTCCGGGTATCATCTTCATCGCTTCTGCTAACAACAAAGTTACCCTGACCACCGGATCC
```

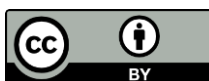

© 2020 by the authors. Submitted for possible open access publication under the terms and conditions of the Creative Commons Attribution (CC BY) license (<http://creativecommons.org/licenses/by/4.0/>).
